# Supplementary material for: 3D printed imaging platform for portable cell counting
Source: Royal Society of Chemistry journal article supplement (doi:10.1039/d1an00778e), 2021-01-01
Supplement: d1an00778e1.pdf [file d1an00778e1.pdf]

## Supplementary Information

### 3D Printed Imaging Platform for Portable Cell Counting

Diwakar M. Awate<sup>a</sup>, Cicero C. Pola<sup>a</sup>, Erica Shumaker<sup>a</sup>, Carmen L. Gomes<sup>a</sup> and Jaime J. Juárez<sup>a,b</sup>

- Department of Mechanical Engineering, Iowa State University, 2529 Union Drive, Ames, IA 50011, United States
- Center for Multiphase Flow Research and Education, Iowa State University, 2519 Union Drive, Ames, IA 50011, United States

### 3D Printed Assembly

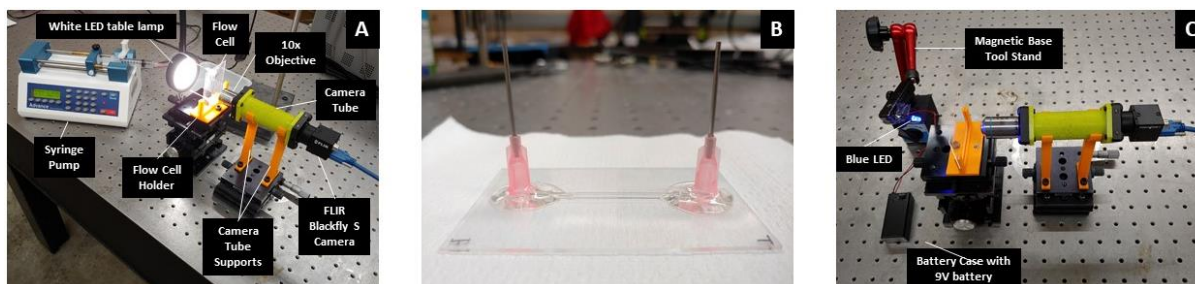

**Figure S1** – Images of the 3D-printed imaging platform (3DPIP) set-up. A) The 3DPIP used for particle counting with all of its components. B) The flow cell that consists of a capillary tube and syringe injection ports. C) The static imaging configuration used for fluorescence microscopy.

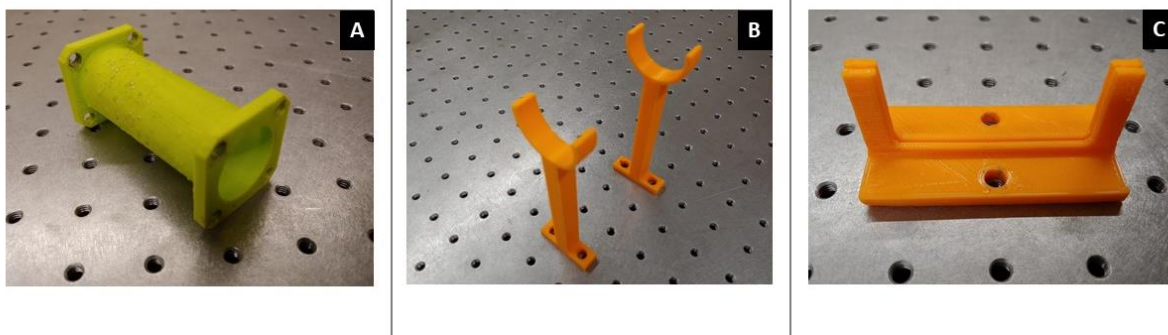

**Figure S2** – 3D-printed assembly: A) Camera Tube. B) Camera Tube Supports. C) Flow Cell Holder.

**Table S1** – Dimensions of the 3D printed components shown in Figure S2

| <b>Part Name</b>    | <b>Length/Height</b> | <b>Width</b> | <b>Diameter</b> |
|---------------------|----------------------|--------------|-----------------|
| Flow Cell Holder    | 76.21 mm             | 35.01 mm     | -               |
| Camera Tube         | 86.2 mm              | -            | 30.47 mm        |
| Camera Tube Support | 91.44 mm             | 63.5 mm      | -               |

**Table S2** –Results of particle counting using the 3DPIP device at 1 mL/h flow rate.

| <b>1 mL/hour</b>  | Experiment 1 Count | Experiment 2 Count | Experiment 3 Count | Average Count |
|-------------------|--------------------|--------------------|--------------------|---------------|
| 3000 particles/mL | 4440               | 4512               | 4344               | 4432          |
| 1000 particles/mL | 1646               | 1620               | 1722               | 1663          |
| 333 particles /mL | 504                | 480                | 492                | 492           |
| 111 particles /mL | 108                | 144                | 120                | 124           |

**Table S3** – Results of particle counting using commercial particle counter at 1 mL/h flow rate.

| <b>1 mL/hour</b>  | Experiment 1 Count | Experiment 2 Count | Experiment 3 Count | Average Count |
|-------------------|--------------------|--------------------|--------------------|---------------|
| 3000 particles/mL | 4146               | 4718               | 3834               | 4233          |
| 1000 particles/mL | 1716               | 1952               | 1548               | 1739          |
| 333 particles/mL  | 496                | 466                | 480                | 481           |
| 111 particles/mL  | 160                | 116                | 104                | 127           |

**Table S4** – Results of particle counting using the 3DPIP device at different flow rates.

| <b>5 mL/hour</b>  | Experiment 1 Count | Experiment 2 Count | Experiment 3 Count | Average Count | Expected Count | % Error |
|-------------------|--------------------|--------------------|--------------------|---------------|----------------|---------|
| 3000 particles/mL | 23601              | 23963              | 23106              | 23557         | 22160          | +5.93   |
| 1000 particles/mL | 8835               | 8722               | 9245               | 8934          | 8315           | +7.44   |
| 333 particles/mL  | 2366               | 2101               | 2616               | 2361          | 2460           | -4.02   |
| 111 particles/mL  | 565                | 573                | 584                | 574           | 620            | -7.42   |
| <b>9 mL/hour</b>  | Experiment 1 Count | Experiment 2 Count | Experiment 3 Count | Average Count | Expected Count | % Error |
| 3000 particles/mL | 45269              | 45828              | 44499              | 45199         | 39888          | +13.31  |
| 1000 particles/mL | 16949              | 16773              | 17648              | 17123         | 14967          | +14.41  |
| 333 particles/mL  | 3962               | 3755               | 3906               | 3874          | 4428           | -12.50  |
| 111 particles/mL  | 896                | 957                | 943                | 932           | 1116           | -16.49  |
| <b>13 mL/hour</b> | Experiment 1 Count | Experiment 2 Count | Experiment 3 Count | Average Count | Expected Count | % Error |
| 3000 particles/mL | 68629              | 69582              | 67399              | 68537         | 57616          | +18.95  |
| 1000 particles/mL | 25714              | 25379              | 26688              | 25927         | 21619          | +19.93  |
| 333 particles/mL  | 7951               | 7640               | 7792               | 7794          | 6396           | +21.86  |
| 111 particles/mL  | 1152               | 1321               | 1209               | 1227          | 1612           | -23.86  |

## Theory

The equation of motion for a spherical particle entrained in a vertically oriented flow is described by Eq. S1,

$$\frac{du_p}{dt} = -6\pi\mu a(u_p - u_f) - F_g + F_b \quad (\text{S1})$$

where,  $u_p$  is the particle velocity,  $t$  is time,  $\mu$  is the fluid viscosity,  $a$  is particle radius,  $u_f$  is the fluid velocity,  $F_g$  is the gravitational force acting on the particle and  $F_b$  is the particle buoyancy force. At steady state, Eq. S1 is described by Eq. S2,

$$0 = -6\pi\mu a(u_p - u_f) - F_g + F_b \quad (\text{S2})$$

which, can be re-arranged to solve for the particle velocity as a function of fluid velocity and body forces. This expression is given by Eq. S3,

$$u_p = u_f + \frac{(F_g - F_b)}{6\pi\mu a} \quad (\text{S3})$$

which, can be simplified by recognizing that  $u_s = (F_b - F_g)/6\pi\mu a$  is the Stokes settling velocity.<sup>1</sup>

The fluid velocity may be found by solving the creeping flow momentum (Eq. S4) and continuity (Eq. S5) equations<sup>2</sup>,

$$-\nabla P + f_b + \mu\nabla^2 u_f = 0 \quad (\text{S4})$$

$$\nabla \cdot u_f = 0 \quad (\text{S5})$$

where,  $P$  is the applied pressure and  $f_b$  is a body force acting on the fluid per unit volume. The solution to these equations for a square geometry is given by Eq. S6<sup>3</sup>,

$$u_f(x, y) = 4 \frac{Q}{w^2} \sum_{n=1,3,5,\dots}^{\infty} \sum_{m=1,3,5,\dots}^{\infty} \frac{\sin(n\pi x/w) \sin(m\pi y/w)}{nm(n^2+m^2)} \quad (S6)$$

where,  $Q$  is the fluid flow rate and  $w$  is the inner width of the square capillary used in these experiments. In this model,  $Q/w^2$  represents the average fluid velocity in the capillary, and the maximum fluid velocity of a square geometry is  $u_{max} \approx 1.79u_{f,avg}$ . Thus, by combining Eqs. S3 and S6, it is possible to see that the particle velocity should depend on position. However, given the nature of this experiment setup, the particle position can only be seen in x and z directions. This limits the ability to determine how far into the sample (y direction) the particle actually is. It is possible to get around this issue by averaging Eq. S3 with position, as described by Eq. S7,

$$u_{p,avg} = u_{f,avg} - u_s \quad (S7)$$

The average fluid velocity is proportional to  $Q/w^2$ , thus Eq. S7 can be expressed as a function of flow rate, described by Eq. S8,

$$u_{p,avg} = kQ/w^2 - u_s \quad (S8)$$

where,  $k$  is a constant of proportionality that depends of capillary geometry.

### **Bacteria Count Calculations**

For each concentration, 2  $\mu$ L of bacteria stock solution was placed in between two 50 mm by 75 mm glass slides. The total number of bacteria cells (TNBC) was calculated as described by Eq. S9,

$$\text{TNBC in } 2\mu\text{L of Sample} = \text{TNBC on Glass Slide} = \left( \frac{\text{Area Occupied by Sample on Glass Slide}}{\text{Area of a Single Sample Image}} \right) \times \text{Average Number of Bacteria Cells in a Single Sample Image} \quad (S9)$$

Therefore, for  $10^3$  cells/mL sample,

$$\text{TNBC in } 2\mu\text{L of Sample} = \left( \frac{440.987 \text{ mm}^2}{0.225 \text{ mm}^2} \right) \times 10 = 1.9599 \times 10^4$$

$$\text{TNBC in 1 mL of Sample} = 1.9599 \times 10^4 \times 500 = 9.7997 \times 10^6$$

**Table S5** - Bacteria cell count per image.

| Prepared concentration (CFU/mL) | Count 1 in 2 $\mu\text{L}$ (cells/image) | Count 2 in 2 $\mu\text{L}$ (cells/image) | Count 3 in 2 $\mu\text{L}$ (cells/image) | Average Count (cells/image) |
|---------------------------------|------------------------------------------|------------------------------------------|------------------------------------------|-----------------------------|
| $4.8 \times 10^3$               | 10                                       | 11                                       | 9                                        | $10 \pm 1.0$                |
| $4.8 \times 10^4$               | 41                                       | 39                                       | 40                                       | $40 \pm 1.0$                |
| $4.8 \times 10^5$               | 146                                      | 150                                      | 155                                      | $150 \pm 4.5$               |
| $4.8 \times 10^6$               | 250                                      | 241                                      | 259                                      | $250 \pm 9.0$               |

### Bacteria Count Validation

For each concentration, 200  $\mu\text{L}$  of 10  $\mu\text{m}$  polystyrene beads sample was dried on a 50 mm by 75 mm glass slide. The total number of particles was calculated as described by Eq. S10,

Total Number of Particles in 200  $\mu\text{L}$  of Sample = Total Number of Particles on Glass Slide

$$= \left( \frac{\text{Area Occupied by Sample on Glass Slide}}{\text{Area of a Single Sample Image}} \right)$$

$$\times \text{Average Number of Particles in a Single Sample Image} \quad (\text{S10})$$

Therefore, for 111 particles/mL sample, with microscope,

$$\text{Total Number of Particles in 200 } \mu\text{L of Sample} = \left( \frac{588.134 \text{ mm}^2}{1.63 \text{ mm}^2} \right) \times 0.0667 = 24.0665$$

$$\text{Total Number of Particles in 1 mL of Sample} = 24.0665 \times 5 = 120.2728$$

Therefore, for 111 particles/mL sample, with 3DPIP,

$$\text{Total Number of Particles in 200 } \mu\text{L of Sample} = \left( \frac{588.134 \text{ mm}^2}{1.79 \text{ mm}^2} \right) \times 0.0667 = 21.9153$$

$$\text{Total Number of Particles in 1 mL of Sample} = 21.9153 \times 5 = 109.5769$$

**Table S6** - Particle count per image using optical microscope.

| Particles/mL | E1 | E2 | E3 | E4 | E5 | E6 | E7 | E8 | E9 | E10 | E11 | E12 | E13 | E14 | E15 | Avg. ct. | Avg. ct./mL |
|--------------|----|----|----|----|----|----|----|----|----|-----|-----|-----|-----|-----|-----|----------|-------------|
| 111          | 0  | 0  | 0  | 0  | 1  | 0  | 0  | 0  | 0  | 0   | 0   | 0   | 0   | 0   | 0   | 0.0667   | 120.2728    |
| 333          | 1  | 0  | 1  | 0  | 0  | 0  | 0  | 0  | 0  | 1   | 0   | 0   | 0   | 0   | 0   | 0.2      | 360.8184    |
| 1000         | 2  | 1  | 1  | 1  | 0  | 2  | 1  | 1  | 0  | 1   | 1   | 0   | 1   | 0   | 1   | 0.8667   | 1563.6065   |
| 3000         | 3  | 3  | 3  | 2  | 2  | 3  | 2  | 2  | 3  | 3   | 2   | 1   | 3   | 2   | 2   | 2.4      | 4329.8208   |

**Table S7** - Particle count per image using the 3DPIP.

| Particles/mL | E1 | E2 | E3 | E4 | E5 | E6 | E7 | E8 | E9 | E10 | E11 | E12 | E13 | E14 | E15 | Avg. ct. | Avg. ct./mL |
|--------------|----|----|----|----|----|----|----|----|----|-----|-----|-----|-----|-----|-----|----------|-------------|
| 111          | 0  | 0  | 0  | 0  | 0  | 0  | 0  | 0  | 0  | 0   | 1   | 0   | 0   | 0   | 0   | 0.0667   | 109.5769    |
| 333          | 0  | 0  | 0  | 0  | 1  | 0  | 0  | 1  | 0  | 0   | 0   | 1   | 1   | 0   | 0   | 0.2667   | 438.1434    |
| 1000         | 1  | 2  | 1  | 1  | 0  | 1  | 0  | 1  | 0  | 1   | 2   | 1   | 2   | 0   | 1   | 0.9334   | 1533.4197   |
| 3000         | 3  | 3  | 3  | 3  | 2  | 3  | 3  | 2  | 3  | 2   | 3   | 3   | 2   | 2   | 2   | 2.6      | 4271.3642   |



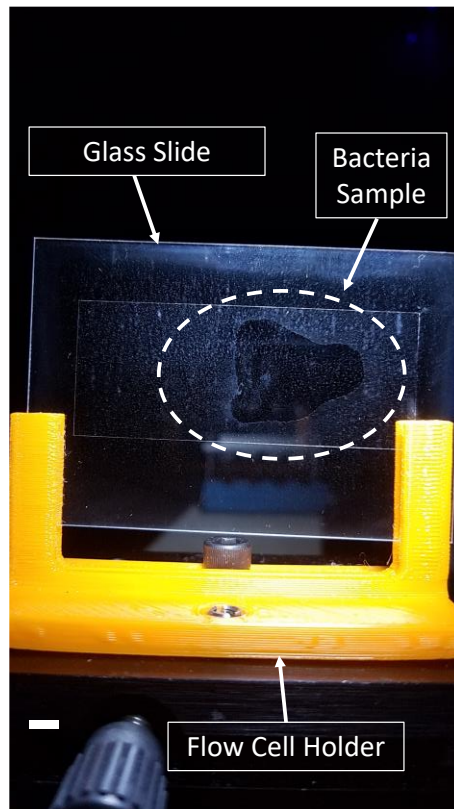

**Figure S3** – Image of the bacteria counting experiment mounted to the flow cell holder with  $10^2$  CFU/mL. Scale bar is 5 mm.

## References

- (1) Hiemenz, P. C. *Principles of Colloid and Surface Chemistry*, 2nd ed.; M. Dekker: New York, 1986.
- (2) Happel, J.; Brenner, H. *Low Reynolds Number Hydrodynamics: With Special Applications to Particulate Media*, 1983 edition.; Springer: The Hague ; Boston : Hingham, MA, USA, 2009.
- (3) Spiga, M.; Morino, G. L. A Symmetric Solution for Velocity Profile in Laminar Flow through Rectangular Ducts. *International Communications in Heat and Mass Transfer* **1994**, *21* (4), 469–475. [https://doi.org/10.1016/0735-1933\(94\)90046-9](https://doi.org/10.1016/0735-1933(94)90046-9).
- (4) Thielicke, W.; Stamhuis, E. J. PIVlab – Towards User-Friendly, Affordable and Accurate Digital Particle Image Velocimetry in MATLAB,. *Journal of Open Research Software* **2014**, *2* (1), 30.
- (5) Thielicke, W.; Stamhuis, E. J. *PIVlab - Time-Resolved Digital Particle Image Velocimetry Tool for MATLAB.*; 2014.
- (6) Meinhart, C. D.; Wereley, S. T.; Gray, M. H. B. Volume Illumination for Two-Dimensional Particle Image Velocimetry. *Meas. Sci. Technol.* **2000**, *11* (6), 809–814. <https://doi.org/10.1088/0957-0233/11/6/326>.
